# Supplementary material for: EGFR Exon-Level Biomarkers of the Response to Bevacizumab/Erlotinib in Non-Small Cell Lung Cancer
Source: PubMed Central journal article supplement (PMC3769372; doi:10.1371/journal.pone.0072966), 2013-09-10
Supplement: pone.0072966.s003.pdf [file pone.0072966.s003.pdf]

| UPN | Age | Gender | Disease stage | DST W12 | Objective response under BE | EGFR mutation   | Biopsy study | Blood study |
|-----|-----|--------|---------------|---------|-----------------------------|-----------------|--------------|-------------|
| 1   | 70  | F      | IV            | 0       | no                          | —               | —            | —           |
| 2   | 69  | M      | IV            | 0       | yes                         | —               | ×            | ×           |
| 3   | 50  | M      | IV            | 1       | no                          | —               | —            | ×           |
| 4   | 49  | M      | IV            | 0       | no                          | —               | —            | —           |
| 5   | 61  | F      | IV            | 1       | no                          | —               | —            | —           |
| 6   | 61  | F      | IV            | 1       | yes                         | —               | —            | —           |
| 7   | 55  | M      | IV            | 0       | no                          | —               | —            | ×           |
| 8   | 65  | F      | IV            | 0       | no                          | —               | —            | ×           |
| 9   | 61  | M      | IV            | 0       | no                          | —               | —            | ×           |
| 10  | 59  | M      | IV            | 1       | no                          | —               | —            | —           |
| 11  | 77  | M      | IIIB          | 1       | no                          | —               | —            | —           |
| 12  | 70  | M      | IIIB          | 1       | no                          | —               | —            | —           |
| 13  | 55  | M      | IV            | 0       | no                          | —               | —            | —           |
| 14  | 53  | M      | IV            | 1       | no                          | —               | —            | ×           |
| 15  | 55  | F      | IV            | 0       | no                          | —               | —            | ×           |
| 16  | 75  | M      | IV            | 1       | yes                         | del(19)         | —            | ×           |
| 17  | 77  | F      | IIIB          | 1       | yes                         | del(19)         | —            | —           |
| 18  | 64  | M      | IV            | 1       | yes                         | L858R(21)       | —            | ×           |
| 19  | 62  | M      | IV            | 0       | no                          | —               | —            | ×           |
| 20  | 74  | M      | IV            | 1       | no                          | —               | —            | ×           |
| 21  | 59  | F      | IV            | 1       | yes                         | —               | —            | ×           |
| 22  | 50  | M      | IV            | 0       | no                          | —               | —            | —           |
| 23  | 53  | F      | IV            | 1       | no                          | —               | ×            | ×           |
| 24  | 80  | F      | IV            | 0       | no                          | L858R(21)       | —            | —           |
| 25  | 59  | M      | IV            | 0       | no                          | —               | —            | ×           |
| 26  | 58  | M      | IV            | 1       | no                          | —               | —            | ×           |
| 27  | 72  | F      | IV            | 0       | no                          | —               | —            | ×           |
| 28  | 68  | F      | IV            | 0       | yes                         | —               | —            | ×           |
| 29  | 57  | M      | IIIB          | 1       | no                          | —               | —            | ×           |
| 30  | 65  | F      | IIIB          | 0       | no                          | —               | —            | ×           |
| 31  | 66  | F      | IIIB          | 0       | yes                         | —               | —            | —           |
| 32  | 71  | F      | IV            | 1       | no                          | —               | —            | —           |
| 33  | 54  | F      | IIIB          | 1       | no                          | —               | —            | —           |
| 34  | 65  | F      | IV            | 0       | no                          | —               | —            | —           |
| 36  | 64  | M      | IV            | 0       | no                          | —               | —            | —           |
| 37  | 61  | M      | IV            | 0       | no                          | del(19)         | —            | ×           |
| 38  | 58  | F      | IV            | 0       | no                          | —               | ×            | ×           |
| 39  | 68  | M      | IV            | 0       | no                          | R705G(18)       | —            | ×           |
| 40  | 53  | M      | IV            | 1       | no                          | —               | —            | ×           |
| 41  | 72  | M      | IV            | 0       | no                          | —               | —            | —           |
| 42  | 51  | F      | IV            | 1       | no                          | —               | —            | ×           |
| 43  | 77  | F      | IV            | 0       | no                          | T790(20)        | —            | —           |
| 44  | 51  | F      | IV            | 0       | no                          | —               | —            | ×           |
| 45  | 68  | M      | IV            | 1       | no                          | —               | —            | —           |
| 46  | 63  | F      | IIIB          | 1       | yes                         | —               | —            | —           |
| 47  | 72  | M      | IV            | 1       | no                          | —               | —            | ×           |
| 48  | 53  | F      | IV            | 0       | no                          | —               | —            | —           |
| 49  | 56  | M      | IV            | 1       | no                          | —               | ×            | ×           |
| 50  | 63  | M      | IV            | 1       | no                          | —               | —            | ×           |
| 51  | 70  | F      | IIIB          | 0       | no                          | —               | ×            | ×           |
| 52  | 71  | M      | IV            | 0       | no                          | —               | —            | —           |
| 53  | 49  | F      | IV            | 1       | no                          | —               | —            | ×           |
| 54  | 49  | M      | IV            | 1       | yes                         | del(19)         | —            | ×           |
| 55  | 55  | F      | IV            | 0       | no                          | —               | ×            | ×           |
| 56  | 61  | F      | IV            | 1       | no                          | —               | ×            | ×           |
| 57  | 66  | F      | IV            | 0       | no                          | —               | ×            | ×           |
| 58  | 46  | F      | IV            | 0       | no                          | —               | ×            | ×           |
| 59  | 47  | F      | IV            | 1       | no                          | —               | —            | ×           |
| 60  | 64  | F      | IV            | 1       | NA                          | —               | ×            | ×           |
| 61  | 61  | F      | IV            | 1       | yes                         | L858R(21)       | ×            | ×           |
| 63  | 48  | F      | IIIB          | 0       | no                          | —               | ×            | ×           |
| 64  | 64  | M      | IV            | 1       | no                          | —               | ×            | ×           |
| 65  | 67  | F      | IV            | 0       | no                          | —               | ×            | ×           |
| 66  | 57  | F      | IIIB          | 1       | no                          | —               | —            | ×           |
| 67  | 53  | M      | IV            | 1       | no                          | —               | ×            | ×           |
| 68  | 63  | M      | IV            | 0       | yes                         | —               | ×            | ×           |
| 69  | 66  | F      | IIIB          | 0       | no                          | —               | ×            | ×           |
| 70  | 35  | M      | IV            | 1       | no                          | —               | ×            | —           |
| 71  | 60  | M      | IV            | 0       | no                          | —               | —            | —           |
| 72  | 56  | F      | IIIB          | 1       | no                          | —               | —            | ×           |
| 73  | 54  | M      | IV            | 0       | no                          | —               | —            | ×           |
| 74  | 61  | M      | IV            | 1       | yes                         | —               | ×            | ×           |
| 75  | 61  | M      | IV            | 0       | no                          | —               | ×            | ×           |
| 76  | 51  | F      | IV            | 1       | no                          | —               | ×            | —           |
| 77  | 54  | M      | IV            | 1       | no                          | —               | ×            | ×           |
| 78  | 63  | F      | IV            | 1       | no                          | del(19)         | ×            | ×           |
| 79  | 32  | F      | IIIB          | 1       | yes                         | del(19)         | —            | ×           |
| 80  | 44  | F      | IV            | 0       | no                          | —               | ×            | ×           |
| 81  | 55  | M      | IV            | 0       | no                          | —               | ×            | ×           |
| 82  | 58  | M      | IV            | 1       | no                          | —               | ×            | ×           |
| 83  | 53  | F      | IV            | 0       | no                          | —               | ×            | ×           |
| 84  | 55  | F      | IV            | 1       | no                          | —               | ×            | ×           |
| 85  | 48  | F      | IV            | 1       | no                          | —               | —            | ×           |
| 86  | 56  | F      | IV            | 0       | no                          | —               | —            | ×           |
| 87  | 74  | M      | IV            | 1       | no                          | —               | ×            | ×           |
| 88  | 78  | M      | IV            | 0       | no                          | —               | ×            | ×           |
| 89  | 68  | F      | IV            | 1       | no                          | del(19)         | —            | ×           |
| 90  | 69  | F      | IV            | 1       | no                          | —               | ×            | ×           |
| 91  | 68  | M      | IV            | 0       | no                          | —               | ×            | ×           |
| 92  | 64  | F      | IV            | 1       | no                          | del(19)         | —            | ×           |
| 93  | 56  | F      | IV            | 1       | no                          | E709A/G719S(18) | ×            | ×           |
| 94  | 49  | F      | IV            | 1       | no                          | —               | ×            | ×           |
| 95  | 64  | M      | IV            | 1       | no                          | —               | ×            | ×           |
| 96  | 77  | M      | IV            | 0       | no                          | —               | ×            | ×           |
| 97  | 68  | F      | IV            | 0       | no                          | —               | ×            | —           |
| 98  | 64  | F      | IV            | 1       | yes                         | —               | ×            | ×           |
| 99  | 48  | M      | IV            | 1       | no                          | —               | ×            | ×           |
| 100 | 60  | F      | IV            | 1       | no                          | —               | —            | —           |
| 101 | 66  | M      | IV            | 0       | no                          | —               | ×            | ×           |
| 102 | 59  | F      | IV            | 1       | no                          | —               | ×            | ×           |
| 103 | 72  | F      | IV            | 1       | no                          | del(19)         | ×            | ×           |
